# Supplementary material for: Gibbs free energy of liquid water derived from infrared measurements
Source: Royal Society of Chemistry journal article supplement (doi:10.1039/c4cp03466j), 2014-01-01
Supplement: c4cp03466j1.pdf [file c4cp03466j1.pdf]

Revised version of the ID CP-ART-08-2014-003466. Submitted to Physical Chemistry Chemical Physics. September 22<sup>th</sup>, 2014.

## Supplementary materials

In this part, we present and compare the OH stretching band decomposition obtained from the MIR experiments under atmospheric conditions (ISTO) with those from the MIR experiments under vacuum (SOLEIL). The two bands (OH stretching and bending band) recorded under atmospheric conditions (figure A1) and the bands recorded under vacuum (figure A2) display the same trend in terms of frequency maximum shift, though with slightly different values. The main peak location shifts toward higher wavenumbers (from 3380.6  $\text{cm}^{-1}$  at 263K up to 3436.5  $\text{cm}^{-1}$  at 363K for experiment under atmospheric conditions and from 3390.3  $\text{cm}^{-1}$  at 275K to 3431.7  $\text{cm}^{-1}$  at 350K for experiment under vacuum). The intensity of the band maximum decreases (from 0.82 a.u at 263K to 0.61 a.u. at 363K for experiment under atmospheric conditions and from 0.85 a.u. at 275K to 0.61 a.u. at 350K for experiment under vacuum). Moreover the band shape varies, also according to the same trend losing the lower wavenumbers and enriching the higher ones. The FWHM increases by about 6.5% with temperature.

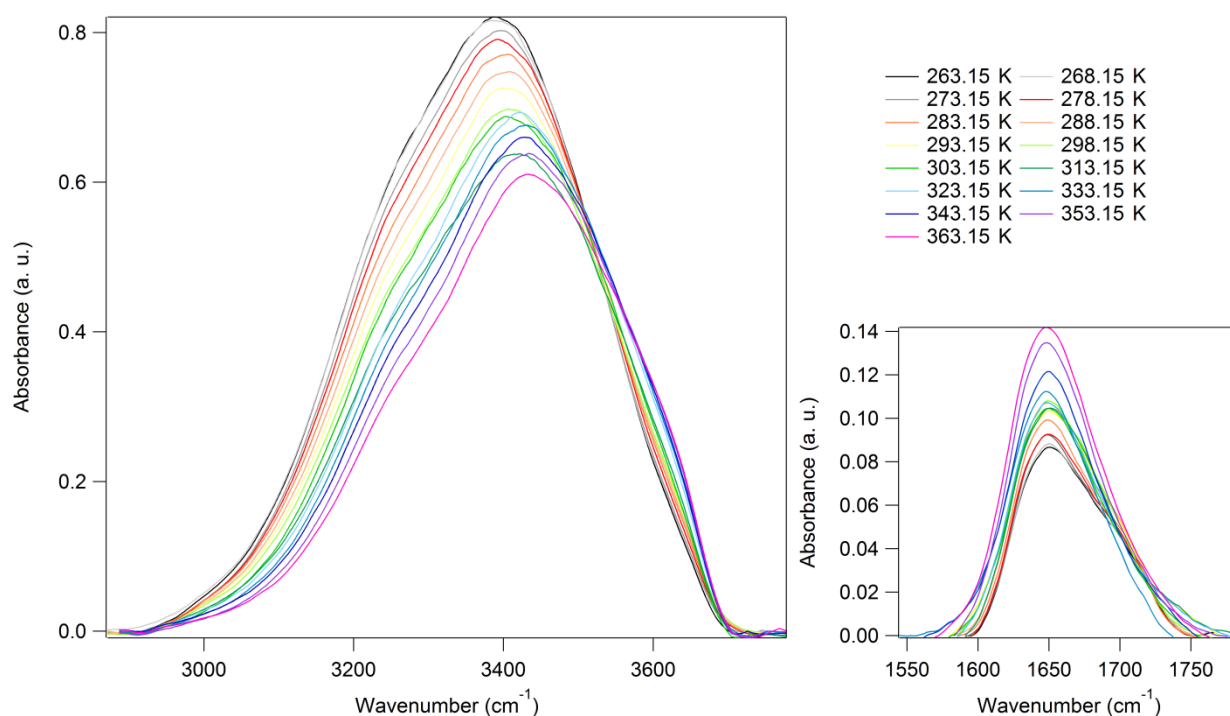

Figure A1. OH stretching band and bending band as a function of the temperature, acquired with the ISTO setup in contact with atmosphere (see section 3.1).

17 Finally, an isobestic-type crossing zone is displayed at high frequencies (see Fig A3), in the same  
 18 thermal range for the two experiments. The temperature at which this quasi-isobestic point  
 19 disappears is 310K for the AILES dataset, and 313K for the ISTO dataset, in good mutual  
 20 agreement.

21 The bending band (Fig. A1) exhibits an increasing absorbance with temperature, and the maximum  
 22 slightly shifts toward lower wavenumbers from 1650.7  $\text{cm}^{-1}$  at 263K to 1648.3  $\text{cm}^{-1}$  at 363K  
 23 (experiment under atmospheric conditions) and from 1651.7  $\text{cm}^{-1}$  at 275K to 1646  $\text{cm}^{-1}$  at 350K  
 24 (experiment under vacuum). The band shape never changes with temperature, except for a  
 25 decreasing FWHM and an increasing absorbance, both observed onto the two datasets.

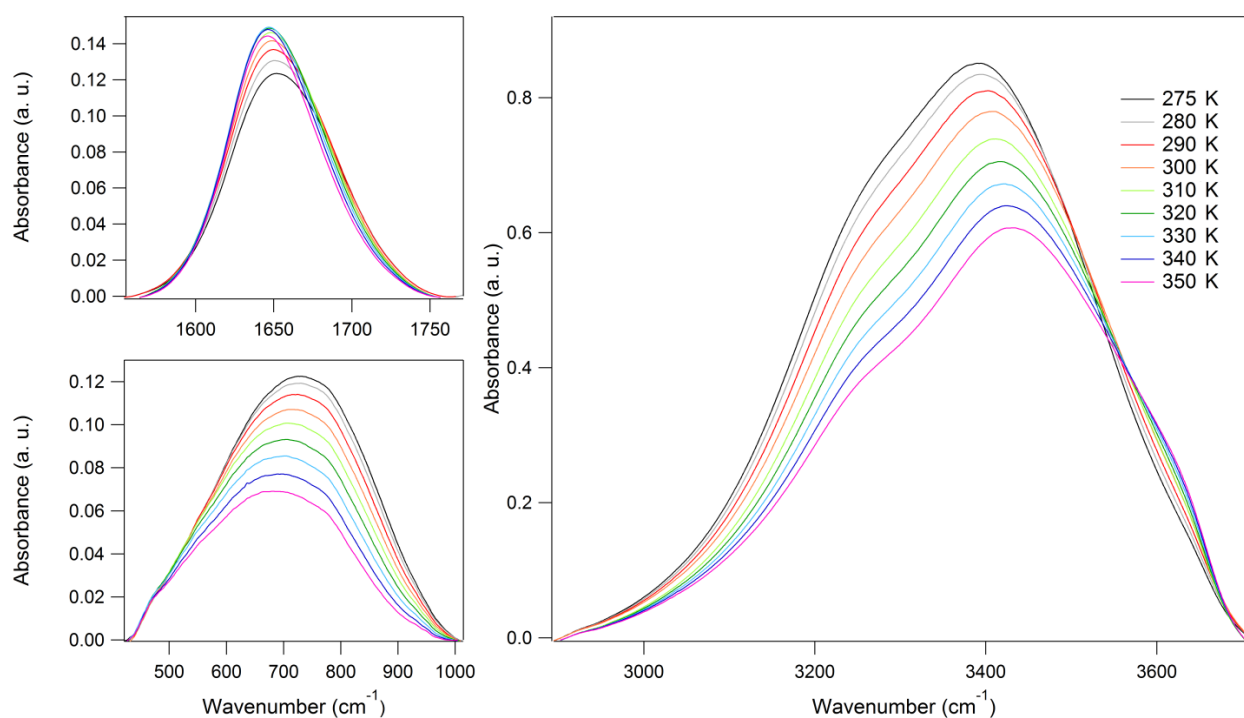

26 Figure A2. OH stretching, bending and libration bands as a function of temperature, acquired with  
 27 the AILES setup, under vacuum (see section 3.2). Due to the experimental condition, the libration  
 28 band is restricted at 426  $\text{cm}^{-1}$ .

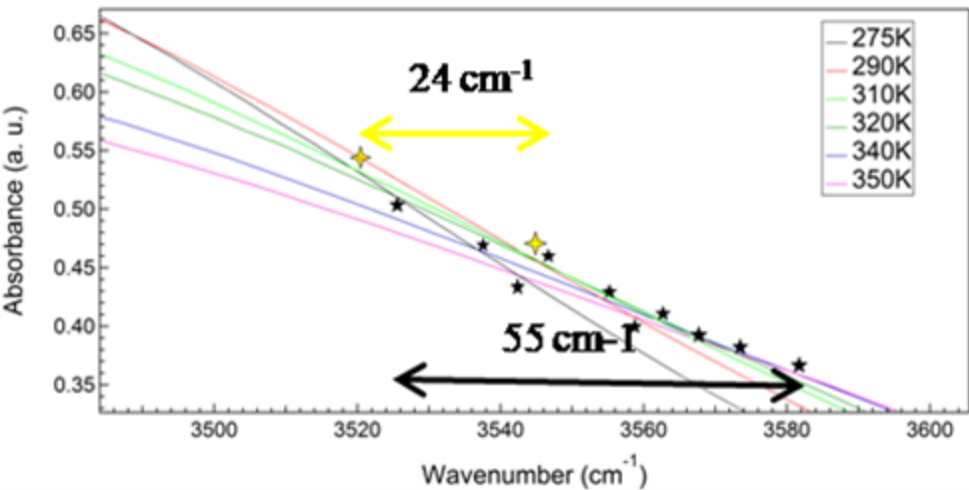

30

31 Figure A3: Zoom on the quasi isobestic spectral domain (spectra measured under vacuum). The  
32 black stars indicate the “isobestic crossings” above 313K, while the yellow stars materialize  
33 “isobestic crossings” below 313K.

34 The decomposition of the OH stretching band into three Gaussian components, ascribed to water  
35 molecules with a given coordination number (NW, IW and MW), enables to refine the inter-  
36 comparison. Table A1 presents the molecular fraction and the frequency of the sub-bands at 263K  
37 and 363K obtained with the ISTO setup.

38 Table A1. Molecular fractions and main peak location of the sub-bands fitted on the OH-stretching  
39 band recorded as a function of temperature with the ISTO setup (in contact with atmosphere).

| Water classes | Temperature | Molecular fractions | Main peak frequency (cm <sup>-1</sup> ) |
|---------------|-------------|---------------------|-----------------------------------------|
| NW            | 263.15K     | 0.692               | 3307                                    |
|               | 363.15K     | 0.510               | 3315                                    |
|               | Variation   | <b>-0.182%/K</b>    | <b>+0.08 cm<sup>-1</sup>/K</b>          |
| IW            | 263.15K     | 0.228               | 3464                                    |
|               | 363.15K     | 0.389               | 3477                                    |
|               | Variation   | <b>+0.161%/K</b>    | <b>+0.13 cm<sup>-1</sup>/K</b>          |
| MW            | 263.15K     | 0.08                | 3572                                    |
|               | 363.15K     | 0.101               | 3600                                    |

|           |                  |                                |
|-----------|------------------|--------------------------------|
| Variation | <b>+0.021%/K</b> | <b>+0.28 cm<sup>-1</sup>/K</b> |
|-----------|------------------|--------------------------------|

40 Table 1 in the main text gives the same information recorded with the AILES setup, comparing the  
 41 trends between the two limit temperatures, 275K and 350K. Both datasets evidence that the NW  
 42 population is dominating along the temperature range but decreases with temperature, while both  
 43 the IW and MW populations increase with temperature (Tables A1 and 1, and Figure A4).  
 44 Moreover, the positions of the three Gaussians are also slightly shifted toward higher frequencies  
 45 with the increasing temperature, and the most pronounced move is observed for MW, the minor one  
 46 for NW (Table A1 and figure A4). The only exception for this regular behavior is given by MW  
 47 calculated from the data over 275-350K, most probably due to the absence of measurements in the  
 48 last 10K, whose slope is markedly increasing on the other dataset (Fig. A4 B).  
 49 Both datasets appears completely consistent, especially with regards to features supporting the  
 50 thermodynamic interpretation. That leads to conclude that the water spectra obtained with usual  
 51 laboratory spectrometer can serve to calculate thermodynamic properties of liquid water.

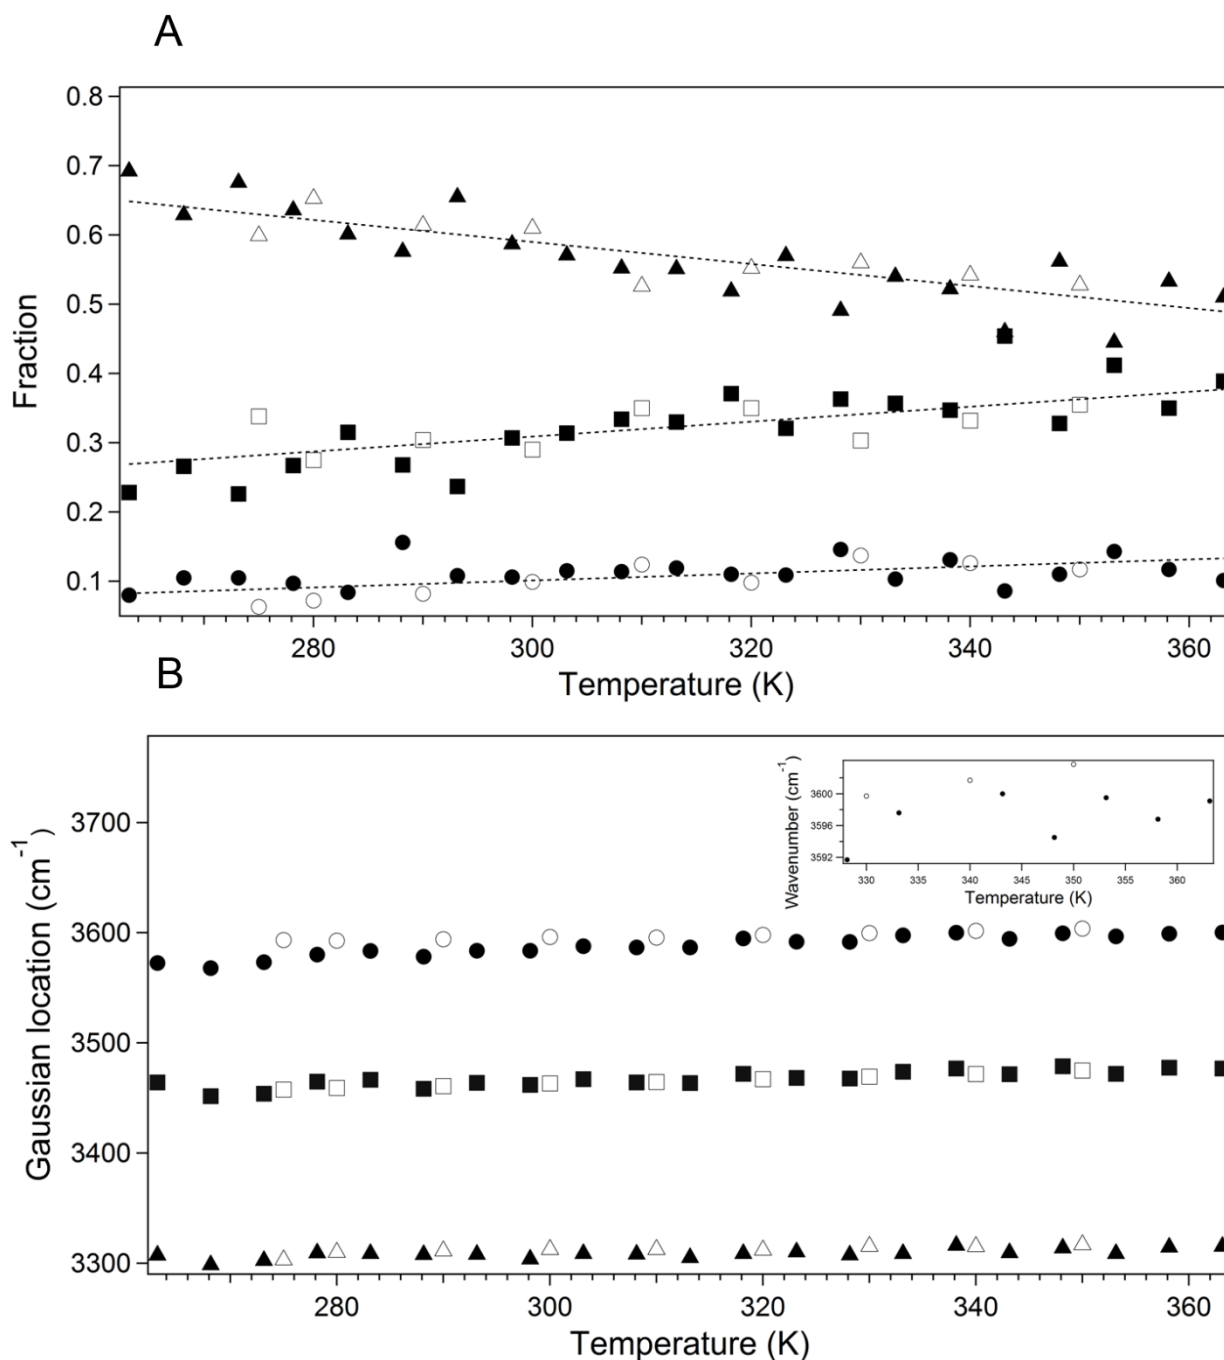

52

53 Figure A4. A. Molecular fractions of the three water populations as a function of temperature. B.

54 frequency of each sub-band as a function of temperature. Circle: MW, Square: IW and Triangle:

55 NW. Filled symbols, ISTO measurements; empty symbols, AILES measurements.
